# Supplementary material for: Differential scanning fluorimetric analysis of the amino-acid binding to taste receptor using a model receptor protein, the ligand-binding domain of fish T1r2a/T1r3
Source: PubMed Central journal article supplement (PMC6777825; doi:10.1371/journal.pone.0218909), 2019-10-04

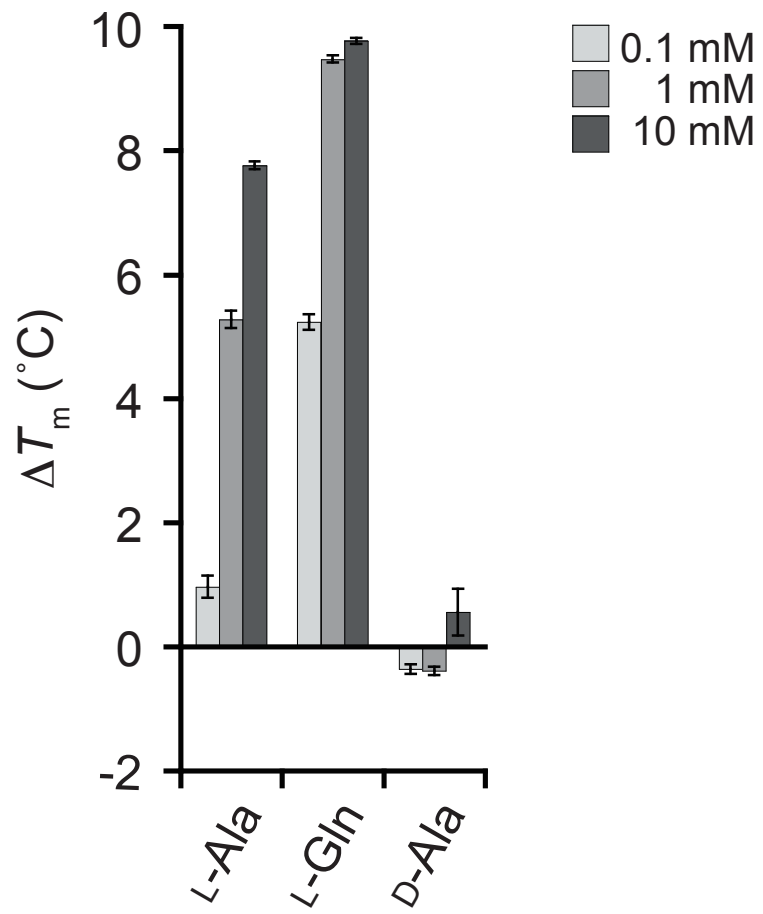

Supplement: pone.0218909.s001.pdf [file pone.0218909.s001.pdf]
