# Supplementary material for: Differential scanning fluorimetric analysis of the amino-acid binding to taste receptor using a model receptor protein, the ligand-binding domain of fish T1r2a/T1r3
Source: PubMed Central journal article supplement (PMC6777825; doi:10.1371/journal.pone.0218909), 2019-10-04
Supplement: pone.0218909.s004.pdf [file pone.0218909.s004.pdf]

**S1 Table.  $\Delta T_m$  and derived  $K_{d-app}$  values estimated from the DSF results of T1r2a/T13LBD at a single ligand concentration.**

| Conc. | $\Delta T_m$ (K) <sup>†</sup> |              |              | $K_{d-app}$ ( $\mu$ M) <sup>‡</sup><br>(fold difference compared with<br>FRET EC <sub>50</sub> ) |                       |                        |
|-------|-------------------------------|--------------|--------------|--------------------------------------------------------------------------------------------------|-----------------------|------------------------|
|       | 0.1 mM                        | 1 mM         | 10 mM        | 0.1 mM                                                                                           | 1 mM                  | 10 mM                  |
| Gly   | -0.04 ± 0.12                  | -0.15 ± 0.07 | 5.08 ± 0.06  | –                                                                                                | –                     | <b>2220</b><br>(0.359) |
| L-Ala | 0.41 ± 0.09                   | 6.92 ± 0.03  | 11.1 ± 0.02  | 664<br>(4.71)                                                                                    | <b>110</b><br>(0.782) | 269<br>(1.91)          |
| L-Ser | -0.14 ± 0.03                  | -1.20 ± 0.03 | 7.32 ± 0.06  | –                                                                                                | –                     | <b>956</b>             |
| L-Thr | -0.06 ± 0.09                  | -1.27 ± 0.08 | 6.99 ± 0.09  | –                                                                                                | –                     | <b>1080</b>            |
| L-Asn | 0.12 ± 0.07                   | 0.38 ± 0.06  | 4.36 ± 0.99  | 2400                                                                                             | 7330                  | <b>3000</b>            |
| L-Gln | 6.26 ± 0.06                   | 10.80 ± 0.05 | 13.6 ± 0.02  | <b>14.1</b><br>(1.22)                                                                            | 29.2<br>(2.54)        | 119<br>(10.4)          |
| L-Asp | -0.06 ± 0.17                  | -1.71 ± 0.19 | 0.74 ± 0.05  | –                                                                                                | –                     | <b>34900</b>           |
| L-Glu | 0.55 ± 0.26                   | 0.48 ± 0.14  | 7.06 ± 0.08  | 488<br>(0.456)                                                                                   | 5700<br>(5.32)        | <b>1050</b><br>(0.982) |
| L-Lys | -0.04 ± 0.03                  | -0.40 ± 0.17 | -3.83 ± 0.30 | –                                                                                                | –                     | –                      |
| L-Arg | 0.45 ± 0.17                   | 6.98 ± 0.08  | 11.0 ± 0.05  | 608<br>(3.20)                                                                                    | 108<br>(0.568)        | <b>274</b><br>(1.44)   |
| L-Val | 0.11 ± 0.24                   | -0.77 ± 0.14 | 7.85 ± 0.03  | 2630                                                                                             | –                     | <b>793</b>             |
| L-Leu | 0.08 ± 0.09                   | -0.94 ± 0.07 | 6.91 ± 0.05  | 3490                                                                                             | –                     | <b>1110</b>            |
| L-Ile | -0.50 ± 0.11                  | -0.57 ± 0.07 | 2.89 ± 2.40  | –                                                                                                | –                     | <b>6040</b>            |
| L-Met | 0.45 ± 0.11                   | 6.17 ± 0.05  | 8.85 ± 0.06  | 604                                                                                              | 146                   | <b>562</b>             |
| L-His | -3.75 ± 0.33                  | 1.21 ± 0.02  | 5.81 ± 0.07  | –                                                                                                | 1960                  | <b>1670</b>            |
| L-Phe | 0.30 ± 0.04                   | 1.04 ± 0.12  | 3.53 ± 0.05  | 918                                                                                              | 2370                  | <b>4370</b>            |
| L-Pro | -0.15 ± 0.04                  | 0.04 ± 0.07  | 7.24 ± 0.02  | –                                                                                                | 79900                 | 985                    |
| D-Ala | 0.15 ± 0.05                   | -0.33 ± 0.07 | -1.03 ± 0.09 | 1950                                                                                             | –                     | –                      |

<sup>†</sup>Average ± s.e.m.,  $n = 4$ . <sup>‡</sup>Amino acid concentration and average  $\Delta T_m$  are substituted with Equation 1 described in Materials and Methods. The values written in bold letters are used for further QSAR analysis.
