# Supplementary material for: Differential scanning fluorimetric analysis of the amino-acid binding to taste receptor using a model receptor protein, the ligand-binding domain of fish T1r2a/T1r3
Source: PubMed Central journal article supplement (PMC6777825; doi:10.1371/journal.pone.0218909), 2019-10-04
Supplement: pone.0218909.s005.pdf [file pone.0218909.s005.pdf]

**S2 Table.  $\Delta$ RFU and derived  $EC_{50\text{-est}}$  values derived from the response assay of T1r2a/T1r3.**

| Conc. | $\Delta$ RFU <sup>†</sup> |              | $EC_{50\text{-est}}$ (mM) |       | $pEC_{50\text{-est}}$ |       |
|-------|---------------------------|--------------|---------------------------|-------|-----------------------|-------|
|       | 5 mM                      | 10 mM        | 5 mM                      | 10 mM | 5 mM                  | 10 mM |
| Gly   | 13.4 ± 3.45               | 46.2 ± 9.00  | 33.8                      | 12.6  | 1.47                  | 1.90  |
| L-Ala | 64.7 ± 12.8               | 90.8 ± 9.46  | 3.06                      | 1.49  | 2.51                  | 2.83  |
| L-Ser | 11.5 ± 2.07               | 33.5 ± 7.59  | 40.5                      | 21.1  | 1.39                  | 1.67  |
| L-Thr | 3.20 ± 1.51               | 18.2 ± 6.01  | 158                       | 47.4  | 0.801                 | 1.32  |
| L-Asn | 0.460 ± 2.58              | 15.7 ± 6.13  | 1130                      | 56.3  | -0.0524               | 1.25  |
| L-Gln | 104.3 ± 4.24              | 81.0 ± 4.64  | –                         | 2.88  | –                     | 2.54  |
| L-Asp | -4.00 ± 1.10              | -9.43 ± 1.83 | –                         | –     | –                     | –     |
| L-Glu | 3.73 ± 1.63               | 30.3 ± 1.85  | 135                       | 24.4  | 0.871                 | 1.61  |
| L-Lys | 8.68 ± 4.29               | 18.5 ± 8.01  | 55.1                      | 46.5  | 1.26                  | 1.33  |
| L-Arg | 68.2 ± 5.39               | 63.4 ± 9.85  | 2.65                      | 6.44  | 2.58                  | 2.19  |
| L-Val | 3.89 ± 1.23               | 32.4 ± 7.56  | 129                       | 22.2  | 0.890                 | 1.65  |
| L-Leu | 0.933 ± 1.91              | 27.8 ± 5.89  | 554                       | 27.5  | 0.257                 | 1.56  |
| L-Ile | 2.90 ± 2.82               | 30.5 ± 6.26  | 175                       | 24.2  | 0.757                 | 1.62  |
| L-Met | -2.52 ± 1.72              | 21.8 ± 7.73  | –                         | 37.9  | –                     | 1.42  |
| L-His | 4.72 ± 2.39               | 14.4 ± 6.62  | 105                       | 62.4  | 0.977                 | 1.20  |
| L-Phe | 2.08 ± 2.32               | 22.4 ± 5.78  | 246                       | 36.5  | 0.609                 | 1.44  |
| L-Pro | 2.90 ± 1.93               | 45.1 ± 7.06  | 175                       | 13.2  | 0.758                 | 1.88  |
| D-Ala | 7.08 ± 2.16               | 23.6 ± 8.83  | 68.7                      | 34.2  | 1.16                  | 1.47  |

<sup>†</sup>Average ± s.e.m.,  $n = 12$  (for L-glutamine at 5 mM), or  $n = 6$  (for others).
