# Supplementary material for: Differential scanning fluorimetric analysis of the amino-acid binding to taste receptor using a model receptor protein, the ligand-binding domain of fish T1r2a/T1r3
Source: PubMed Central journal article supplement (PMC6777825; doi:10.1371/journal.pone.0218909), 2019-10-04
Supplement: pone.0218909.s006.pdf [file pone.0218909.s006.pdf]

**S3 Table. Affinities to mFT1r2a/T1r3LBD derived from the DSF results and physicochemical parameters for the  $\alpha$ -substituent group of amino acids.**

| L-amino acid | Affinity       |                |                | Physicochemical parameters |                   |                  |                               |                 |
|--------------|----------------|----------------|----------------|----------------------------|-------------------|------------------|-------------------------------|-----------------|
|              | $pK_{d-app}^a$ | $\pi_\alpha^b$ | $E_s^{1c}{}^c$ | HP <sup>d</sup>            | $\log K_{d-CW}^e$ | $\Delta MgVol^f$ | Hydropathy Index <sup>g</sup> | pI <sup>h</sup> |
| Gly          | 2.65           | 0              | 0              | 2.39                       | -0.69             | 0                | -0.4                          | 5.97            |
| Ala          | 3.95           | 0.28           | -0.2           | 1.94                       | -1.33             | 0.32             | 1.8                           | 6               |
| Ser          | 3.02           | -0.19          | -0.48          | -5.06                      | 2.49              | 0.38             | -0.8                          | 5.68            |
| Thr          | 2.97           | 0.07           | -0.73          | -4.88                      | 1.89              | 0.52             | -0.7                          | 5.6             |
| Asn          | 2.52           | -0.52          | -0.98          | -9.68                      | 4.88              | 0.58             | -3.5                          | 5.41            |
| Gln          | 4.85           | -0.52          | -0.82          | -9.38                      | 4.07              | 0.72             | -3.5                          | 5.65            |
| Asp          | 1.46           | 0.05           | -0.98          | -10.95                     | 3.27              | 0.53             | -3.5                          | 2.77            |
| Glu          | 2.98           | 0.02           | -0.82          | -10.2                      | 2.25              | 0.68             | -3.5                          | 3.22            |
| Arg          | 3.56           | -0.42          | -0.82          | -19.92                     | 4.32              | 1                | -4.5                          | 10.76           |
| Val          | 3.10           | 1              | -1.29          | 1.99                       | -2.97             | 0.6              | 4.2                           | 5.96            |
| Leu          | 2.96           | 1.52           | -1.44          | 2.28                       | -3.62             | 0.74             | 3.8                           | 5.98            |
| Ile          | 2.22           | 1.43           | -1.81          | 2.15                       | -3.62             | 0.74             | 4.5                           | 6.02            |
| Met          | 3.25           | 0.99           | -1.03          | -1.48                      | -1.73             | 0.76             | 1.9                           | 5.74            |
| His          | 2.78           | 0.17           | -0.86          | -10.27                     | 3.34              | 0.75             | -3.2                          | 7.59            |
| Phe          | 2.36           | 1.78           | -0.9           | -0.76                      | -2.19             | 0.93             | 2.8                           | 5.48            |

<sup>a</sup>Converted from the values in Supplementary Table 1. <sup>b</sup>For hydrophobicity. Cited from Akamatsu *et al.*, *J. Pharm. Sci.*, 83, 1026 (1994). <sup>c</sup>For steric effects. Cited from Akamatsu *et al.*, *J. Pharm. Sci.*, 83, 1026 (1994). <sup>d</sup>For hydration potential. Cited from Wolfenden *et al.*, *Biochemistry*, 20, 849 (1981). <sup>e</sup>For polarity. Cited from Radzicka & Wolfenden, *Biochemistry*, 27, 1664 (1988), free energies for transfer from cyclohexane to an aqueous solution. <sup>f</sup>McGowan volumes [ref.: McGowan, *J. Appl. Chem. Biotechnol.*, 28, 599 (1978)] calculated by BioLoom (BioByte, Claremont, CA, USA). <sup>g</sup>For hydrophobicity/hydrophilicity. Cited from Kyte & Doolittle, *J. Mol. Biol.*, 157, 105 (1982). <sup>h</sup>Cited from Handbook of Chemistry and Physics, CRC Press.
